# Supplementary material for: An amphoteric betaine electrolyte additive enabling a stable Zn metal anode for aqueous batteries
Source: Royal Society of Chemistry journal article supplement (doi:10.1039/d2cc02553a), 2022-01-01
Supplement: d2cc02553a1.pdf [file d2cc02553a1.pdf]

## **Electronic supplementary information**

### **An amphoteric betaine electrolyte additive enabling a stable Zn metal anode for aqueous batteries**

Zhongqiu Jia, Wenzhi Zhao, Shouyan Hu, Xianpeng Yang, Tianshun He, Xiaoqi Sun\*

Department of Chemistry, Northeastern University, 3-11 Wenhua Road, Shenyang, 110819,  
China

\* E-mail: [sunxiaoqi@mail.neu.edu.cn](mailto:sunxiaoqi@mail.neu.edu.cn)

## Experimental Section

### Material synthesis

VO<sub>2</sub> was obtained by microwave assisted hydrothermal reaction (Monowave 200 synthesis system Anton Paar). 0.4 g of V<sub>2</sub>O<sub>5</sub> and 0.6 g of H<sub>2</sub>C<sub>2</sub>O<sub>4</sub> · 2H<sub>2</sub>O were dissolved in deionized water. In a microwave reactor, the solution was heated at 75 °C for 5 min, and then at 180 °C for 10 min. After cooling to room temperature, the precipitation was filtered, washed with deionized water and ethanol, and dried at 60 °C in a vacuum oven.

### Characterizations

<sup>1</sup>H nuclear magnetic resonance (<sup>1</sup>H NMR) was carried out on a Bruker Avance NEO 600 M. Fourier transform infrared (FT-IR) spectroscopy was collected on the Lambda 650S spectrometer (UK PerkinElmer). Raman spectra were obtained from a LabRAM HR Evolution series high-resolution Raman spectrometer (Nano Wizard Ultra Speed & inVia Raman, Germany) with a laser wavelength of 633 nm. Zeta potentials were measured on Malvern Zetasizer Nano S90. X-ray diffraction (XRD) was performed on a PANalytical Empyrean diffractometer with Cu-Kα radiation. Morphologies were examined using field-emission scanning electron microscope (HITACHI, SU8010, Japan).

### Electrochemical measurements

VO<sub>2</sub> electrodes were prepared by mixing VO<sub>2</sub> with Ketjen Black (KB) and polyvinylidene fluoride (PVDF) at 7:2:1 weight ratio in N-methyl-2-pyrrolidone (NMP). Zn//Zn cells and Zn//Cu cells were assembled in CR2032 coin cells. Zn//VO<sub>2</sub> cells were assembled in PFA Swagelok cells. Cyclic voltammetry (CV) and linear polarization tests were carried out in T-shaped three-electrode PFA Swagelok cells. Linear polarization was carried out with Zn, graphite paper and SCE as the working, counter and reference electrodes, respectively. The electric double-layer capacitance (EDLC) was measured with Zn as the working, counter and reference electrodes. The EDLC was calculated according to the equation of  $C_{dl} = i/v$ , where  $C_{dl}$  was the EDLC,  $i$  was the current density and  $v$  was the scan rate. Half of the cathodic and anodic current density difference at -2.5 mV (vs. Zn) was plotted vs. scan rate, and linear fit was carried out to obtain

$C_{dl}$ . CV of plating/stripping was tested with graphite paper, Zn and SCE as the working, counter and reference electrodes, respectively. The electrochemical measurements were performed on LANHE CT2001A battery cyclers or Biologic VMP3.

## Supporting Figures and Table

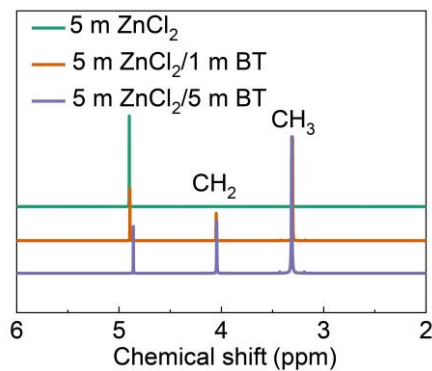

Figure S1.  $^1\text{H}$  NMR of the three electrolytes.

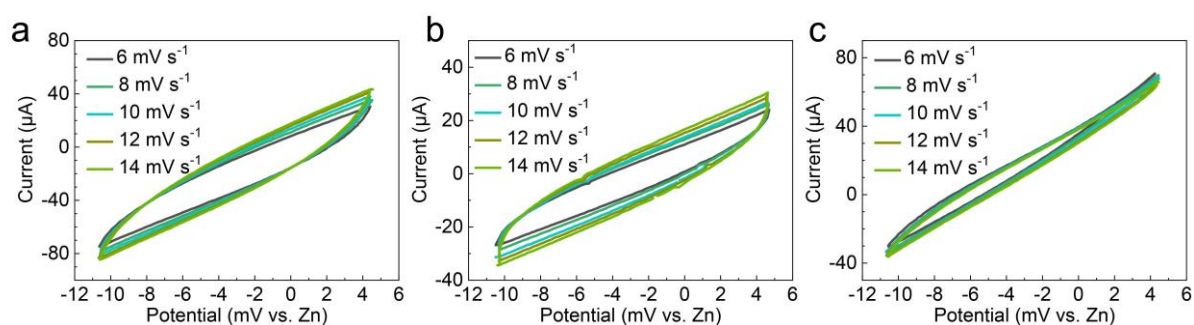

Figure S2. CV curves of Zn electrode in a) 5 m  $\text{ZnCl}_2$ , b) 5 m  $\text{ZnCl}_2/1$  m BT, c) 5 m  $\text{ZnCl}_2/5$  m BT in the non-Faraday region at various scan rates.

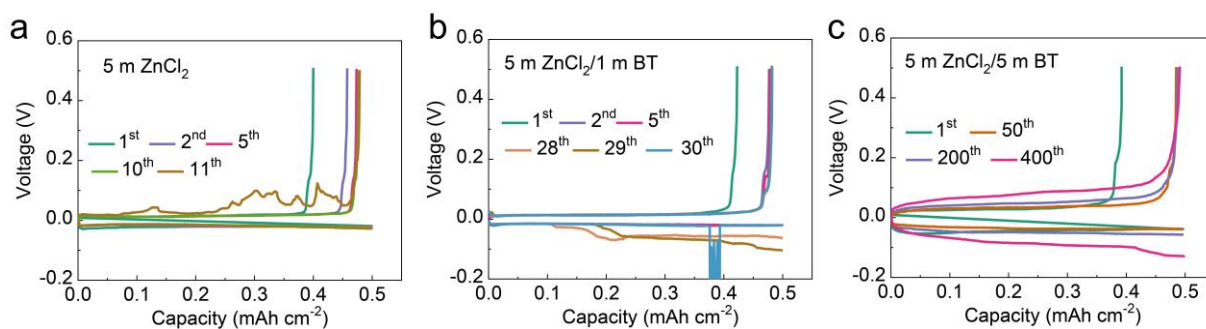

Figure S3. The voltage curves of coulombic efficiency tests in the a) 5 m  $\text{ZnCl}_2$ , b) 5 m  $\text{ZnCl}_2/1$  m BT, c) 5 m  $\text{ZnCl}_2/5$  m BT electrolytes.

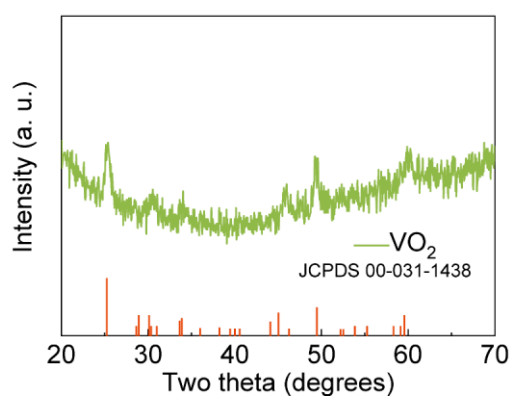

Figure S4. XRD pattern of VO<sub>2</sub>.

Table S1. Corrosion parameters of zinc electrode in the three electrolytes.

| electrolyte                   | $\beta_a$ (mV) | $\beta_c$ (mV) | $E_{\text{corr}}$ (mV) | $i_{\text{corr}}$ ( $\mu\text{A cm}^{-2}$ ) |
|-------------------------------|----------------|----------------|------------------------|---------------------------------------------|
| 5 m ZnCl <sub>2</sub>         | 49.0           | -49.7          | -930                   | 477                                         |
| 5 m ZnCl <sub>2</sub> /1 m BT | 31.0           | -31.5          | -951                   | 153                                         |
| 5 m ZnCl <sub>2</sub> /5 m BT | 27.5           | -30.8          | -986                   | 39                                          |
